# Supplementary material for: Association between Vitamin D Receptor Polymorphisms (BsmI and FokI) and Glycemic Control among Patients with Type 2 Diabetes
Source: PubMed Central journal article supplement (PMC7914454; doi:10.3390/ijerph18041595), 2021-02-08
Supplement: ijerph-18-01595-s001.pdf [file ijerph-18-01595-s001.pdf]

**Supplementary Materials**

**Table S1.** Vitamin D level among different category of BMI category in all study participants.

| BMI Category | Vitamin D            |                       |                     | Test Stat (df) | p-Value |
|--------------|----------------------|-----------------------|---------------------|----------------|---------|
|              | Sufficient (n = 100) | Insufficient (n = 77) | Deficiency (n = 12) |                |         |
| Normal       | 37 (37.0)            | 23 (29.9)             | 3 (25.0)            | -              | 0.848 # |
| Overweight   | 36 (36.0)            | 31 (40.3)             | 5 (41.7)            |                |         |
| Obese        | 27 (27.0)            | 23 (29.9)             | 4 (33.3)            |                |         |

# Fisher exact test p-value.

**Table S2.** Vitamin D level among different category of BMI category in healthy control group.

| BMI Category | Vitamin D           |                       |                    | Test Stat (df) | p-Value |
|--------------|---------------------|-----------------------|--------------------|----------------|---------|
|              | Sufficient (n = 31) | Insufficient (n = 29) | Deficiency (n = 3) |                |         |
| Normal       | 14 (45.2)           | 11 (37.9)             | 0 (0.0)            | -              | 0.486 # |
| Overweight   | 11 (35.5)           | 12 (41.4)             | 3 (100.0)          |                |         |
| Obese        | 6 (19.4)            | 6 (20.7)              | 0 (0.0)            |                |         |

# Fisher exact test p-value.

**Table S3.** Vitamin D level among different category of BMI category in good diabetic control.

| BMI Category | Vitamin D           |                       |                    | Test Stat (df) | p-Value |
|--------------|---------------------|-----------------------|--------------------|----------------|---------|
|              | Sufficient (n = 38) | Insufficient (n = 22) | Deficiency (n = 3) |                |         |
| Normal       | 13 (34.2)           | 7 (31.8)              | 0 (0.0)            | -              | 0.697 # |
| Overweight   | 16 (42.1)           | 9 (40.9)              | 1 (33.3)           |                |         |
| Obese        | 9 (23.7)            | 6 (27.3)              | 2 (66.7)           |                |         |

# Fisher exact test p-value.

**Table S4.** Vitamin D level among different category of BMI category in poor diabetic control.

| BMI Category | Vitamin D           |                       |                    | Test Stat (df) | p-Value |
|--------------|---------------------|-----------------------|--------------------|----------------|---------|
|              | Sufficient (n = 31) | Insufficient (n = 26) | Deficiency (n = 6) |                |         |

|            |           |           |          |   |         |
|------------|-----------|-----------|----------|---|---------|
| Normal     | 10 (32.3) | 5 (19.2)  | 3 (50.0) | - | 0.613 # |
| Overweight | 9 (29.0)  | 10 (38.5) | 1 (16.7) |   |         |
| Obese      | 12 (38.7) | 11 (42.3) | 2 (33.3) |   |         |

# Fisher exact test p-value.

**Table S5.** Haplotype frequencies of FokI (VDR 2228570 C > T) and BsmI (VDR1544410 G > A) among T2DM and healthy control.

| rs1544410/ rs2228570 | Frequency | DM (Cases) | Healthy Control | Chi-Square | p-Value |
|----------------------|-----------|------------|-----------------|------------|---------|
| GC                   | 0.487     | 0.509      | 0.441           | 1.556      | 0.2123  |
| GT                   | 0.360     | 0.344      | 0.392           | 0.846      | 0.3576  |
| AC                   | 0.085     | 0.090      | 0.074           | 0.254      | 0.6142  |
| AT                   | 0.069     | 0.057      | 0.092           | 1.621      | 0.2029  |

**Table S6.** Haplotype association of FokI (VDR 2228570 C > T) and BsmI (VDR1544410 G > A) among T2DM and healthy control.

| rs1544410/ rs2228570 | DM (Cases) | Healthy Control | OR (Confidence Interval) | p-Value |
|----------------------|------------|-----------------|--------------------------|---------|
| GC                   | 128.4      | 55.6            | (1) Reference            | -       |
| GT                   | 86.6       | 49.4            | 0.759 (0.474–1.215)      | 0.251   |
| AC                   | 22.6       | 9.4             | 1.041 (0.457–2.371)      | 0.920   |
| AT                   | 14.4       | 11.6            | 0.538 (0.233–1.239)      | 0.141   |

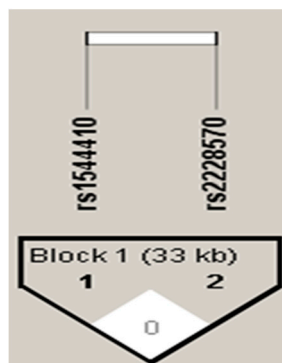

**Figure S1.** Linkage disequilibrium (LD) of FokI (VDR 2228570 C>T) and BsmI (VDR1544410 G>A).
